# Supplementary material for: Stereoselective coronas regulate the fate of chiral gold nanoparticles in vivo
Source: Royal Society of Chemistry journal article supplement (doi:10.1039/d3nh00124e), 2023-01-01
Supplement: d3nh00124e2.xlsx [file d3nh00124e2.xlsx]

## Sheet: Human serum
Accession	Description	Relative abundance, %	Standard deviation, %
F6KPG5	Albumin	42.4553	0.585162
B4E1B2	Serotransferrin	7.23023	0.219911
V9HW68	Epididymis luminal protein 214	6.55733	1.25172
P01023	Alpha-2-macroglobulin	4.71097	1.23423
P02647	Apolipoprotein A-I	4.25071	0.19905
Q96K68	SNC73 protein	2.67443	0.137709
Q6PIL8	IGK@ protein	2.36653	0.2437
P01024	Complement C3	2.13846	0.200946
A0A384MDQ7	Epididymis secretory sperm binding protein	1.64788	0.303717
P00738	Haptoglobin	1.61904	0.587624
P01871	Immunoglobulin heavy constant mu	1.45504	0.45772
Q6N093	Uncharacterized protein	1.29477	0.0791714
S6BGD6	IgG L chain	1.28035	0.213417
P02790	Hemopexin	1.09903	0.00844475
A0A0G2JPR0	Complement C4-A	1.00715	0.338869
C8C504	Beta-globin	0.99291	0.29524
V9HWF6	Alpha-1-acid glycoprotein	0.791387	0.134644
P12259	Coagulation factor V	0.707472	0.172518
A5PL27	CP protein	0.642715	0.00833057
A3KPE2	Apolipoprotein C-III	0.625111	0.141019
P02766	Transthyretin	0.618158	0.0527116
P08603	Complement factor H	0.613593	0.10464
D9IWP9	Beta-2-glycoprotein I	0.606246	0.0561475
V9HWI6	Epididymis secretory protein Li 51	0.561014	0.0514607
A0A0K0K1H8	Epididymis secretory sperm binding protein Li 71p	0.560833	0.0585784
P00734	Prothrombin	0.535153	0.0457044
A0A024R1N1	Myosin, heavy polypeptide 9	0.534638	0.0691549
P02765	Alpha-2-HS-glycoprotein	0.44765	0.0924814
A0A024R462	Fibronectin 1	0.424412	0.0320962
B4E1Z4	Complement factor B	0.392074	0.0747758
P04217	Alpha-1B-glycoprotein	0.378083	0.0104062
B4E1C2	Kininogen 1	0.3626	0.026657
Q5EBM2	Uncharacterized protein	0.352245	0.107225
D1MGQ2	Alpha-2 globin	0.329948	0.191798
C0JYY2	Apolipoprotein B	0.318477	0.0311533
P00747	Plasminogen	0.318226	0.0156703
A8K9P0	albumin	0.309663	0.104772
P06727	Apolipoprotein A-IV	0.299284	0.0264676
P19823	Inter-alpha-trypsin inhibitor heavy chain H2	0.273017	0.0337817
A0A286YFJ8	Immunoglobulin heavy constant gamma 4 (	0.272641	0.0681933
A0A0A0MSV6	Complement C1q subcomponent subunit B	0.271666	0.0700837
A5A163	MHC class I antigen	0.228541	0.0425095
A0A384NKS6	Clusterin	0.220181	0.013874
A2KBC6	Anti-FactorVIII scFv	0.210537	0.0381563
B2R8I2	histidine-rich glycoprotein (HRG)	0.209478	0.0363548
B2RMS9	Inter-alpha (Globulin) inhibitor H4	0.209412	0.0261713
B4E1D8	C4b-binding protein alpha	0.209076	0.0389208
A0A024R6P0	Serpin peptidase inhibitor, clade A	0.208253	0.0422429
Q5UGI6	Serine/cysteine proteinase inhibitor clade G member 1 splice variant 2	0.20611	0.0318047
V9GYM3	Apolipoprotein A-II	0.199248	0.00698325
A0A0X9T7T4	MS-D3 heavy chain variable region	0.195797	0.0383125
P02549	Spectrin alpha chain, erythrocytic 1	0.191481	0.0254575
O43866	CD5 antigen-like	0.18506	0.0567842
B7Z539	Inter-alpha-trypsin inhibitor heavy chain H1	0.179179	0.00602386
A0A0X9TD47	MS-D1 light chain variable region	0.15877	0.0241075
P19652	Alpha-1-acid glycoprotein 2	0.146454	0.0192452
D9ZGG2	Vitronectin	0.139582	0.0128377
A0A384MEF1	Epididymis secretory sperm binding protein	0.132309	0.0173036
P04275	von Willebrand factor	0.131942	0.0204626
P01008	Antithrombin-III	0.131452	0.00943638
P13671	Complement component C6	0.130954	0.0222345
P04899	Guanine nucleotide-binding protein G(i) subunit alpha-2	0.129089	0.0241619
A2NB46	Cold agglutinin FS-2 L-chain	0.127401	0.0177095
Q9UL88	Myosin-reactive immunoglobulin heavy chain variable region	0.123717	0.0233777
P22352	Glutathione peroxidase 3	0.117221	0.0319854
P02760	Protein AMBP	0.115521	0.0134361
P02675	Fibrinogen beta	0.103655	1.02604
Q53GZ8	Complement component 2	0.0958979	0.0582683
P43652	Afamin	0.0926521	0.0117605
Q0ZCG0	Immunglobulin heavy chain variable region	0.0861663	0.0187551
A0A140TA29	Complement C4-B	0.0791875	0.0426608
P02671	Fibrinogen alpha chain	0.0709888	0.487745
P27169	Serum paraoxonase/arylesterase 1	0.0658406	0.0091979
Q53HU9	Complement component 1 r	0.0657092	0.014547
A0A024R9Q1	Thrombospondin 1	0.0638772	0.0131048
P02654	Apolipoprotein C-I	0.05648	0.00417424
P01031	Complement C5	0.0530812	0.00731864
P09871	Complement C1s	0.0516296	0.0254453
Q13201	Multimerin-1	0.0516282	0.013006
Q6ZW64	Protein Tro alpha1 H	0.0509261	0.124975
A0A024R035	Complement component 9	0.0395658	0.00347479
P01591	Immunoglobulin J	0.0371395	0.00866953
P07225	Vitamin K-dependent protein S	0.0335227	0.00224019
P07357	Complement component C8 alpha	0.033472	0.00323375
O75636	Ficolin-3	0.0288563	0.00521639
A0A024RAA7	Adiponectin B	0.0218652	0.00423305
P13645	Keratin, type I cytoskeletal 10	0.0217358	0.015983
Q9UK54	Hemoglobin beta subunit variant	0.0182686	0.0183321
P02649	Apolipoprotein E	0.0170324	0.000976092
P07358	Complement component C8 beta	0.0167686	0.0019996
P07360	Complement component C8 gamma	0.015907	0.00261001
E2RVJ0	Anion exchange protein	0.0155851	0.0047225
A0A140VJI7	Testicular tissue protein Li 61	0.0129618	0.00226409
D3JV41	C-X-C motif chemokine	0.0120095	0.00512937
P63261	Actin, cytoplasmic 2	0.0115438	0.00171879
Q03591	Complement factor H-related protein 1	0.0113506	0.00256855
Q14520	Hyaluronan-binding protein 2	0.0108061	0.00456051
P02745	Complement C1qA	0.0106751	0.00326218
P02679	Fibrinogen gamma chain	0.0103024	0.788794
P16157	Ankyrin-1	0.0092408	0.00157373
P02776	Platelet factor 4	0.00848639	0.00342679
P48740	Mannan-binding lectin serine protease 1	0.00648157	0.000578202
M0R1Q1	Complement C3	0.00597657	0.0012954
P02743	Serum amyloid P-component	0.00516532	0.00168868
Q562R1	Beta-actin-like protein 2	0.00442872	0.00744267
P08514	Integrin alpha-IIb	0.00385242	0.000425067
P15169	Carboxypeptidase N catalytic chain	0.00334507	0.00107459
Q1WWM3	EPB41 protein	0.00287533	0.00020738
Q9Y6Z7	Collectin-10	0.00276005	0.000428692
P27918	Properdin	0.00249846	0.00072461
H6VRF8	Keratin 1	0.00229056	0.0469133
B2RA39	complement factor H-related 5	0.00198735	0.000502672
P35527	Keratin, type I cytoskeletal 9	0.00195256	0.0142948
P10643	Complement component C7	0.00189777	0.000948919
Q9Y490	Talin-1	0.00125378	0.000337561
Q9BWP8	Collectin-11	0.00110943	0.000658807
O00187	Mannan-binding lectin serine protease 2	0.0010753	0.000165343
A0A024R1T9	ATP-citrate synthase	0.00107377	0.000615157
Q8NI99	Angiopoietin-related protein 6	0.000552206	0.000201239
Q4LDE5	Sushi, von Willebrand factor type A	0.000526959	0.000467832
W0UV28	Ribonuclease A A1	0.000381755	0.000138358
P26572	Alpha-1,3-mannosyl-glycoprotein 2-beta-N-acetylglucosaminyltransferase	0.000332639	0.000211159
Q05DH1	Proteasome subunit alpha type	0.000103282	0.0481164
P0DJI8	Serum amyloid A-1 protein	2.58238e-05	0.00113319
Q59FB2	Chordin-like 1 variant	0	0.158578
B4E0H8	Integrin alpha-3	0	0.000339211

## Sheet: L-Au NPs
Accession	Description	Relative abundance, %	Standard deviation, %
F6KPG5	Albumin	19.4677	2.22976
P01024	Complement C3	11.4088	3.21785
A0A024R462	Fibronectin 1	8.49539	1.53492
V9HW68	Epididymis luminal protein 214	3.89617	1.67089
A0A0G2JPR0	Complement C4-A	3.55865	0.557216
B4E1B2	Serotransferrin	3.14738	1.48727
P08603	Complement factor H	2.99186	0.483932
P02647	Apolipoprotein A-I	2.88642	0.861936
P02776	Platelet factor 4	2.74107	0.152169
P01871	Immunoglobulin heavy constant mu	2.13255	0.251267
A0A024RAA7	Adiponectin B	2.13241	1.09343
A3KPE2	Apolipoprotein C-III	2.00888	0.125132
P01023	Alpha-2-macroglobulin	1.99204	0.611362
Q6PIL8	IGK@ protein	1.92358	0.861091
A0A0A0MSV6	Complement C1qB	1.80009	0.676689
P02675	Fibrinogen beta	1.66984	0.402735
P02679	Fibrinogen gamma	1.6431	0.565963
B4E1D8	C4b-binding protein alpha	1.43842	0.341684
Q5EBM2	Uncharacterized protein	1.28099	0.272386
Q96K68	SNC73 protein	1.03021	0.347374
P02745	Complement C1qA	0.937702	0.593969
S6BGD6	IgG L chain	0.897246	0.647886
A0A384NKS6	Clusterin	0.789055	0.0773398
C8C504	Beta-globin	0.76974	0.348066
P27918	Properdin	0.767315	0.298228
A0A024R035	Complement component 9	0.762533	0.314831
Q6N093	Uncharacterized protein	0.751196	0.761015
P02671	Fibrinogen alpha	0.726548	0.991501
P06727	Apolipoprotein A-IV	0.721625	0.11132
P02790	Hemopexin	0.641508	0.853965
Q53HU9	Complement component 1r	0.591372	0.0336314
P00738	Haptoglobin	0.561386	0.801757
P09871	Complement C1s	0.454996	0.115766
A0A384MDQ7	Epididymis secretory sperm binding protein	0.446411	0.426951
P12259	Coagulation factor V	0.434265	0.215367
P00734	Prothrombin	0.425186	0.188034
A0A140TA29	Complement C4-B	0.415217	0.0403639
A0A024R9Q1	Thrombospondin 1	0.396609	0.078679
C0JYY2	Apolipoprotein B	0.380257	0.272969
H6VRF8	Keratin 1	0.378223	0.194397
D1MGQ2	Alpha-2 globin	0.362868	0.088359
P02549	Spectrin alpha chain	0.342069	0.0506782
V9HWF6	Alpha-1-acid glycoprotein	0.311766	0.481145
A0A024R1N1	Myosin, heavy polypeptide 9	0.298276	0.13567
P01031	Complement C5	0.290506	0.0980124
P02649	Apolipoprotein E	0.289561	0.0250138
P13671	Complement component C6	0.283402	0.0256084
A5PL27	CP protein	0.282873	0.341132
V9HWI6	Epididymis secretory protein Li 51	0.281531	0.363186
B4E1C2	Kininogen 1	0.281206	0.243993
D9ZGG2	Vitronectin	0.271395	0.0309397
D3JV41	C-X-C motif chemokine	0.262051	0.124707
D9IWP9	Beta-2-glycoprotein I	0.241106	0.359543
A0A0K0K1H8	Epididymis secretory sperm binding protein Li 71p	0.237237	0.390099
B4E1Z4	Complement factor B	0.232325	0.21542
P02765	Alpha-2-HS-glycoprotein	0.229591	0.245863
P00747	Plasminogen	0.212366	0.233399
V9GYM3	Apolipoprotein A-II	0.207859	0.209445
A0A384MEF1	Epididymis secretory sperm binding protein	0.205079	0.0839913
A8K9P0	albumin	0.201302	0.243445
P01008	Antithrombin-III	0.197932	0.117985
Q59FB2	Chordin-like 1 variant	0.197017	0.285661
P04217	Alpha-1B-glycoprotein	0.19211	0.289294
P13645	Keratin, type I cytoskeletal 10	0.180817	0.0734711
P02766	Transthyretin	0.159814	0.183177
P19823	Inter-alpha-trypsin inhibitor heavy chain H2	0.156398	0.178107
Q13201	Multimerin-1	0.154117	0.118836
Q03591	Complement factor H-related protein 1	0.149409	0.0356228
A0A0X9T7T4	MS-D3 heavy chain variable region	0.144292	0.108888
B2RMS9	Inter-alpha (Globulin) inhibitor H4	0.139572	0.0957229
P04275	von Willebrand factor	0.137054	0.0451677
P02654	Apolipoprotein C-I	0.136396	0.0283139
O43866	CD5 antigen-like	0.131482	0.139699
A0A286YFJ8	Immunoglobulin heavy constant gamma 4	0.131465	0.165964
A0A024R6P0	Serpin peptidase inhibitor, clade A	0.128465	0.0572425
B2RA39	complement factor H-related 5	0.126945	0.0215291
P07357	Complement component C8 alpha	0.126786	0.0287223
A2KBC6	Anti-FactorVIII scFv	0.119953	0.120626
B2R8I2	Histidine-rich glycoprotein (HRG)	0.118052	0.135502
A0A140VJI7	Testicular tissue protein Li 61	0.108887	0.147578
P07225	Vitamin K-dependent protein S	0.108319	0.0224001
E2RVJ0	Anion exchange protein	0.106839	0.0385038
B7Z539	Inter-alpha-trypsin inhibitor heavy chain H1	0.104986	0.122366
Q05DH1	Proteasome subunit alpha type	0.10494	0.170701
P07360	Complement component C8	0.0975104	0.0177163
A0A0X9TD47	MS-D1 light chain variable region	0.0958784	0.0841207
W0UV28	Ribonuclease A A1	0.0924886	0.0489657
P16157	Ankyrin-1	0.092078	0.0380508
B2RMN7	Spectrin beta chain	0.0884524	0.0452931
A5A163	MHC class I antigen	0.0861622	0.107405
P35527	Keratin, type I cytoskeletal 9	0.0857233	0.0552895
Q4LDE5	Sushi, von Willebrand factor type A,	0.084818	0.115015
P07358	Complement component C8 beta	0.0808481	0.0296579
M0R1Q1	Complement C3	0.0798901	0.0169538
P0DJI8	Serum amyloid A-1	0.0691686	0.0241255
P01591	Immunoglobulin J	0.0647037	0.0250189
B4E0H8	Integrin alpha-3	0.0578845	0.0928335
P02743	Serum amyloid P-component	0.0560855	0.0213948
P63261	Actin, cytoplasmic 2	0.0375258	0.00920628
P27169	Serum paraoxonase/arylesterase 1	0.036035	0.0319304
P21333	Filamin-A	0.0346849	0.00912919
Q9UK54	Hemoglobin beta subunit variant	0.0335236	0.00123178
Q9Y490	Talin-1	0.0330627	0.00715829
P08514	Integrin alpha-IIb	0.0299782	0.00433111
Q562R1	Beta-actin-like protein 2	0.0156601	0.00975715
Q14520	Hyaluronan-binding protein 2	0.0136663	0.00572542
O75636	Ficolin-3	0.0122021	0.0150386
Q1WWM3	EPB41 protein	0.00910283	0.0033539
P48740	Mannan-binding lectin serine protease 1	0.00830887	0.00316043
O00187	Mannan-binding lectin serine protease 2	0.00783217	0.00303276
Q9Y6Z7	Collectin-10	0.00560801	0.00127143
Q8NI99	Angiopoietin-related protein 6	0.00401735	0.0022678
P15169	Carboxypeptidase N catalytic chain	0.00369891	0.00306198
Q9BWP8	Collectin-11	0.00309838	0.00122953

## Sheet: D-Au NPs
Accession	Description	Relative abundance, %	Standard deviation, %
P01024	Complement C3	19.6927	1.4665
F6KPG5	Albumin	10.3748	1.34268
A0A0G2JPR0	Complement C4-A	4.70787	0.325966
P08603	Complement factor H	4.70072	0.98144
A0A024R462	Fibronectin 1	4.62491	1.49136
V9HW68	Epididymis luminal protein 214	4.04705	0.330679
A0A024RAA7	Adiponectin B	3.82148	0.345192
P02776	Platelet factor 4	3.54754	0.294866
A3KPE2	Apolipoprotein C-III	2.86767	0.0434118
A0A0A0MSV6	Complement C1qB	2.8619	0.214807
P01871	Immunoglobulin heavy constant mu	2.64865	0.212363
P02647	Apolipoprotein A-I	2.47037	0.27855
B4E1D8	C4b-binding protein alpha	2.00929	0.234335
Q6PIL8	IGK@ protein	1.89018	0.198475
P02745	Complement C1qA	1.74626	0.275309
C8C504	Beta-globin	1.5849	0.34457
P27918	Properdin	1.51427	0.217218
Q5EBM2	Uncharacterized protein	1.50346	0.243701
A0A024R035	Complement component 9	1.44632	0.149425
P02549	Spectrin alpha chain	1.02067	0.286596
A0A384NKS6	Clusterin	0.985166	0.0841993
B4E1B2	Serotransferrin	0.893625	0.219763
P06727	Apolipoprotein A-IV	0.851449	0.204508
D1MGQ2	Alpha-2 globin	0.760808	0.214412
H6VRF8	Keratin 1	0.709828	0.258015
Q53HU9	Complement component 1r	0.684894	0.0308201
E2RVJ0	Anion exchange protein	0.627419	0.327398
S6BGD6	IgG L chain	0.622657	0.0491908
P09871	Complement C1s	0.619426	0.0557946
P01031	Complement C5	0.568814	0.0177362
A0A140TA29	Complement C4-B	0.536331	0.07153
P12259	Coagulation factor V	0.53073	0.0343177
B2RMN7	Spectrin beta chain	0.493079	0.228661
Q6N093	Uncharacterized protein	0.450808	0.00479818
A0A024R9Q1	Thrombospondin 1	0.449221	0.07186
P13671	Complement component C6	0.438458	0.0492429
P16157	Ankyrin-1	0.438182	0.187756
P02679	Fibrinogen gamma	0.43466	0.3395
P02675	Fibrinogen beta	0.428349	0.330162
P02649	Apolipoprotein E	0.422862	0.0228283
P00734	Prothrombin	0.396009	0.0306575
P13645	Keratin, type I cytoskeletal 10	0.383055	0.0845689
D9ZGG2	Vitronectin	0.37648	0.0278104
P01023	Alpha-2-macroglobulin	0.351937	0.0898224
D3JV41	C-X-C motif chemokine	0.325789	0.0328387
P02671	Fibrinogen alpha	0.314381	0.147158
Q96K68	SNC73 protein	0.303627	0.0226017
A0A024R1N1	Myosin, heavy polypeptide 9	0.287295	0.0321555
C0JYY2	Apolipoprotein B	0.272676	0.0540207
P35527	Keratin, type I cytoskeletal 9	0.262353	0.140564
A0A384MDQ7	Epididymis secretory sperm binding protein	0.256383	0.00582753
P07357	Complement component C8 alpha	0.248131	0.0270053
A0A384MEF1	Epididymis secretory sperm binding protein	0.220637	0.0110618
Q03591	Complement factor H-related protein 1	0.203575	0.0548848
P02654	Apolipoprotein C-I	0.20123	0.0322933
B4E1C2	Kininogen 1	0.199752	0.0270179
B2RA39	complement factor H-related 5	0.192457	0.0391685
B4E1Z4	Complement factor B	0.173129	0.0149624
P07360	Complement component C8	0.163873	0.0163519
P01008	Antithrombin-III	0.153736	0.0203363
P02790	Hemopexin	0.152611	0.0285322
P02743	Serum amyloid P-component	0.147521	0.0489638
A0A024R6P0	Serpin peptidase inhibitor, clade A	0.146901	0.0219761
V9GYM3	Apolipoprotein A-II	0.144378	0.0138398
P07225	Vitamin K-dependent protein S	0.143806	0.00654112
Q13201	Multimerin-1	0.142052	0.00375194
P07358	Complement component C8 beta	0.130278	0.0137586
B2RMS9	Inter-alpha (Globulin) inhibitor H4	0.121772	0.00707173
A5PL27	CP protein	0.120933	0.0173647
M0R1Q1	Complement C3	0.119857	0.0273312
P00738	Haptoglobin	0.117933	0.0373809
P04275	von Willebrand factor	0.111491	0.00728825
W0UV28	Ribonuclease A A1	0.111218	0.0166822
V9HWI6	Epididymis secretory protein Li 51	0.107308	0.00652074
P63261	Actin, cytoplasmic 2	0.102901	0.0248948
A0A0X9T7T4	MS-D3 heavy chain variable region	0.102084	0.00366535
P0DJI8	Serum amyloid A-1	0.098554	0.00387322
A8K9P0	albumin	0.0952369	0.0215397
P00747	Plasminogen	0.0859367	0.0130692
Q9Y490	Talin-1	0.0839243	0.0184408
P21333	Filamin-A	0.0812609	0.0194752
P02765	Alpha-2-HS-glycoprotein	0.080419	0.0113655
A0A0X9TD47	MS-D1 light chain variable region	0.0719852	0.00699606
P02766	Transthyretin	0.067621	0.0111032
P19823	Inter-alpha-trypsin inhibitor heavy chain H2	0.0667301	0.00728452
D9IWP9	Beta-2-glycoprotein I	0.0616704	0.0071809
Q59FB2	Chordin-like 1 variant	0.0610001	0.0426424
Q4LDE5	Sushi, von Willebrand factor type A,	0.0607124	0.0179122
O43866	CD5 antigen-like	0.0595878	0.0133308
A2KBC6	Anti-FactorVIII scFv	0.0579518	0.00249444
P01591	Immunoglobulin J	0.0575388	0.00715244
P08514	Integrin alpha-IIb	0.0560934	0.0117423
Q9UK54	Hemoglobin beta subunit variant	0.0546898	0.0156849
V9HWF6	Alpha-1-acid glycoprotein	0.0510356	0.0274105
A0A140VJI7	Testicular tissue protein Li 61	0.0479256	0.0214556
Q1WWM3	EPB41 protein	0.0459279	0.0191979
B7Z539	Inter-alpha-trypsin inhibitor heavy chain H1	0.0412027	0.00387596
P04217	Alpha-1B-glycoprotein	0.0371061	0.00566086
B2R8I2	Histidine-rich glycoprotein (HRG)	0.0336103	0.00433812
A0A286YFJ8	Immunoglobulin heavy constant gamma 4	0.0323937	0.00138729
Q05DH1	Proteasome subunit alpha type	0.0272515	0.028135
A5A163	MHC class I antigen	0.0230135	0.0235576
P27169	Serum paraoxonase/arylesterase 1	0.0224838	0.00129959
Q562R1	Beta-actin-like protein 2	0.022399	0.00513133
A0A0K0K1H8	Epididymis secretory sperm binding protein Li 71p	0.0193335	0.0026293
Q14520	Hyaluronan-binding protein 2	0.0113964	0.00132658
B4E0H8	Integrin alpha-3	0.0103667	0.00928122
P48740	Mannan-binding lectin serine protease 1	0.00889725	0.00224178
O00187	Mannan-binding lectin serine protease 2	0.00771575	0.00135392
O75636	Ficolin-3	0.00717137	0.00159779
Q9Y6Z7	Collectin-10	0.00440854	0.000330222
Q8NI99	Angiopoietin-related protein 6	0.00393075	0.000880463
Q9BWP8	Collectin-11	0.00307284	0.00051024
P15169	Carboxypeptidase N catalytic chain	0.00115285	0.000557774
